# Supplementary material
Source: JCI journal article supplement (doi:10.1172/jci203575)

**Figure 1B**

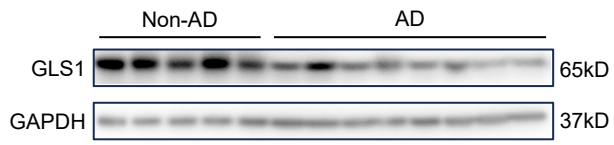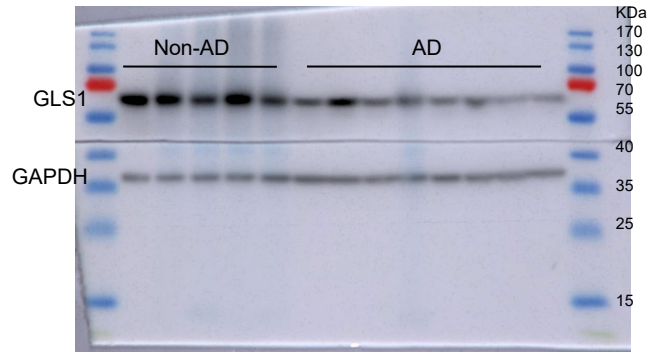

**Figure 2A**

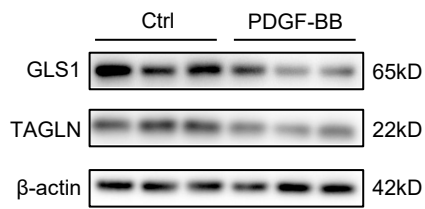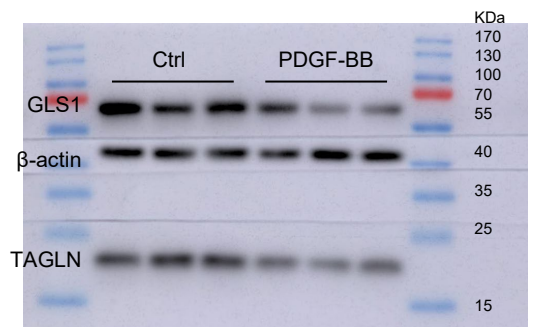

**Figure 7I**

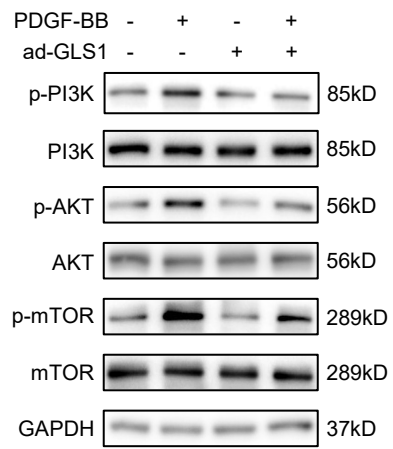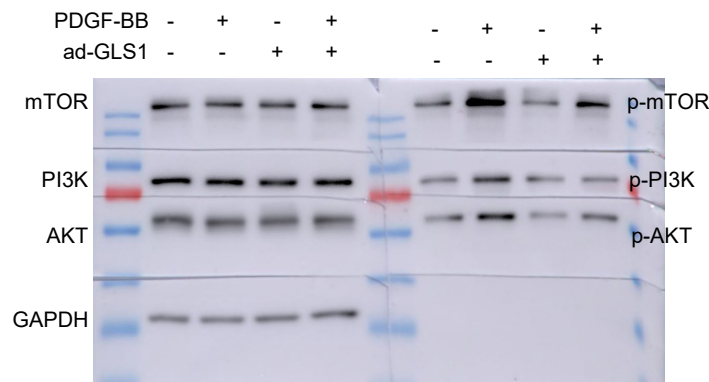

**Figure 8B**

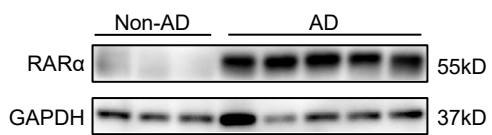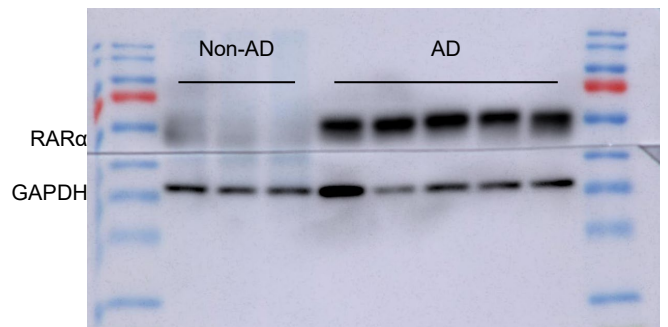

Supplement Fig 2A

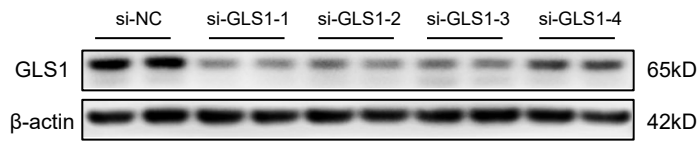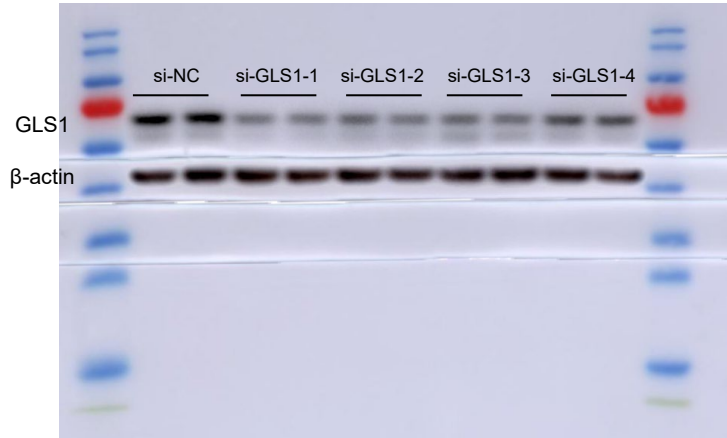

Supplement Fig 2B

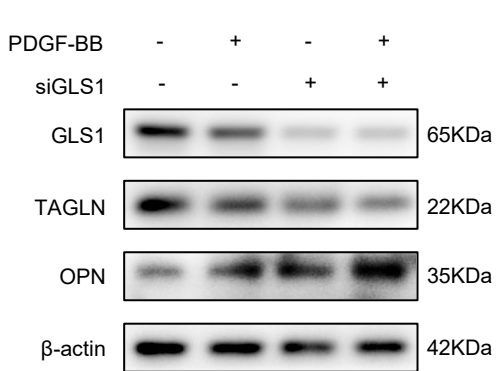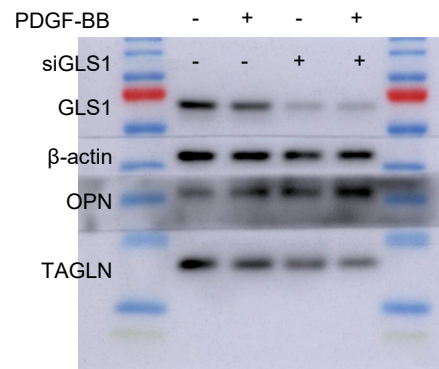

**Supplement Fig 3A**

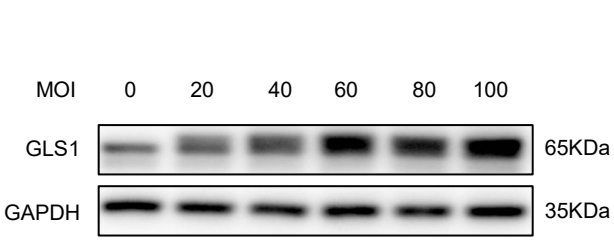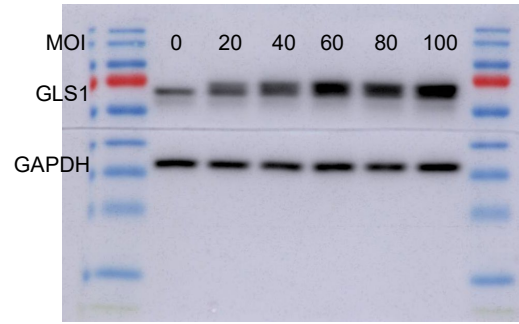

**Supplement Fig 3B**

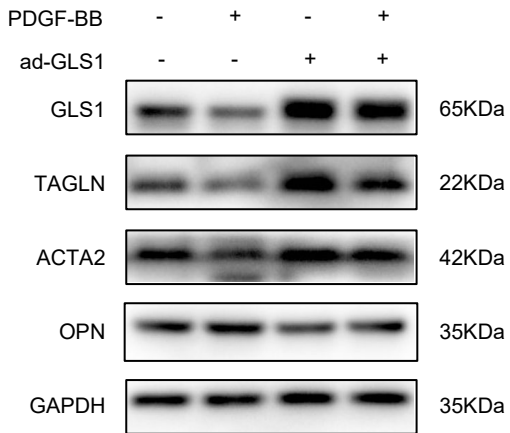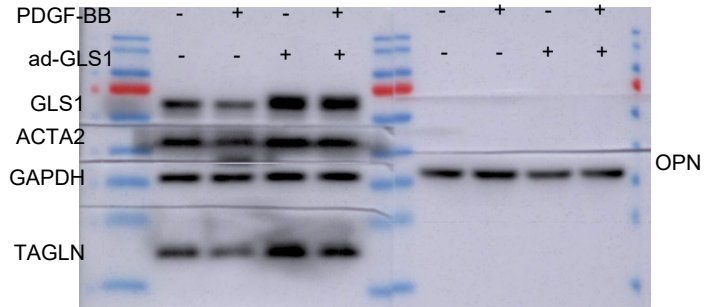

Supplement Fig 7B

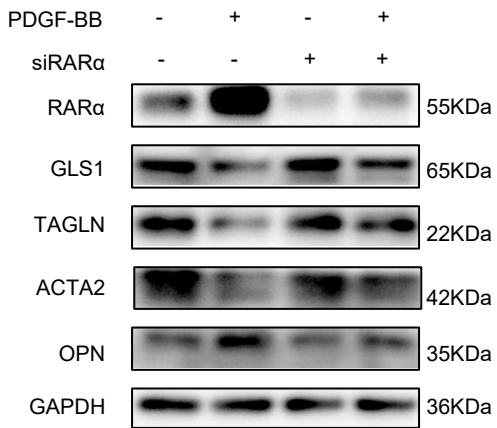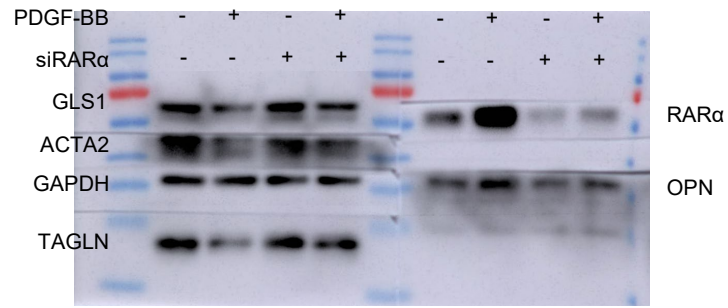

Supplement: sd2 [file 2]
