# Supplementary material
Source: JCI journal article supplement (doi:10.1172/jci203575)
Supplement: sd1 [file 1]

## Supplemental Material

### GLS1 governs vascular smooth muscle cell phenotypic switching and aortic dissection via glutamate metabolism

#### Authors

Wei Xie<sup>1,#</sup>; Chen Ning<sup>3,#</sup>; Chen Lu<sup>1</sup>; Dongjin Wang<sup>4</sup>; Shuang Zhao<sup>3,\*</sup>; Tianyu Song<sup>2,\*</sup>;  
Hailong Cao<sup>1,\*</sup>.

#### Affiliations

<sup>1</sup>Department of Cardiac Surgery, Zhongda Hospital, School of Medicine, Southeast University, Nanjing, Jiangsu, China;

<sup>2</sup>School of Medicine, Nanjing University of Chinese Medicine, Nanjing, Jiangsu, China;

<sup>3</sup>School of Pharmacy, Nanjing Medical University, Nanjing, Jiangsu, China.;

<sup>4</sup> Department of Cardiac Surgery, Nanjing Drum Tower Hospital, Affiliated Hospital of Medical School, Nanjing University, Nanjing, Jiangsu, China.

\* Corresponding author

# These authors contributed equally

#### **\*Corresponding author:**

\*Hailong Cao, MD, PhD.

Department of Cardiac Surgery, Zhongda Hospital, School of Medicine, Southeast University.

Address: No. 87 Dingjiaqiao, Gulou District, Nanjing, Jiangsu Province, 210009, China

Tel: +86-25-83262261

E-mail: hailongcao\_zd@163.com; hailongcao@seu.edu.cn

\*Tianyu Song, PhD.

School of Medicine, Nanjing University of Chinese Medicine.

Address: No. 138 Xianlin Avenue, Qixia District, Nanjing, Jiangsu Province, 210023, China

30 Tel: +86-15250966190

31 E-mail: tianyusong@njucm.edu.cn;

32

33 \*Shuang Zhao, PhD.

34 School of Pharmacy, Nanjing Medical University.

35 Address: No. 101 Longmian Ave, Jiangning District, Nanjing, Jiangsu, 211166, China

36 Tel: +86-15720800551

37 E-mail: zhaoshuang@njmu.edu.cn.

38

39 **Supplemental Tables**

40 **Supplemental table S1. The characteristics of patients**

41

| <b>Patients</b> | <b>Age (years)</b> | <b>Gender</b> | <b>Smoking</b> | <b>BMI (kg/m<sup>2</sup>)</b> | <b>Hypertension</b> | <b>Diabetes mellitus</b> | <b>Hyperlipidemia</b> |
|-----------------|--------------------|---------------|----------------|-------------------------------|---------------------|--------------------------|-----------------------|
| Non-AD1         | 58                 | Male          | No             | 23.1                          | Yes                 | No                       | No                    |
| Non-AD2         | 67                 | Female        | Yes            | 26.7                          | No                  | No                       | Yes                   |
| Non-AD3         | 54                 | Female        | No             | 22.9                          | Yes                 | Yes                      | Yes                   |
| Non-AD4         | 62                 | Male          | Yes            | 25.3                          | No                  | No                       | No                    |
| Non-AD5         | 63                 | Female        | No             | 24.5                          | No                  | No                       | No                    |
| AD1             | 59                 | Male          | No             | 24.8                          | Yes                 | No                       | Yes                   |
| AD2             | 68                 | Female        | Yes            | 27.2                          | No                  | No                       | No                    |
| AD3             | 55                 | Male          | No             | 23.6                          | Yes                 | No                       | No                    |
| AD4             | 72                 | Female        | Yes            | 25.9                          | Yes                 | Yes                      | No                    |
| AD5             | 60                 | Female        | No             | 26.0                          | Yes                 | No                       | Yes                   |
| AD6             | 64                 | Male          | No             | 24.2                          | Yes                 | No                       | No                    |
| AD7             | 57                 | Female        | Yes            | 25.5                          | No                  | No                       | No                    |
| AD8             | 63                 | Male          | No             | 23.8                          | Yes                 | No                       | No                    |

42

| <b>Variables</b>                    | <b>Non-AD (n=5)</b> | <b>AD(n=8)</b> | <b>P value</b> |
|-------------------------------------|---------------------|----------------|----------------|
| Age (years, Mean ± SD)              | 60.8 ± 5.0          | 62.3 ± 5.7     | 0.65           |
| Male (N, %)                         | 2 (40%)             | 4 (50%)        | 1.00           |
| Smoking (N, %)                      | 2 (40%)             | 3 (37.5%)      | 1.00           |
| BMI (kg/m <sup>2</sup> , Mean ± SD) | 24.5 ± 1.6          | 25.1 ± 1.2     | 0.44           |
| Hypertension (N, %)                 | 2 (40%)             | 6 (75%)        | 0.29           |
| Diabetes mellitus (N, %)            | 1 (20%)             | 1 (12.5%)      | 1.00           |
| Hyperlipidemia (N, %)               | 2 (40%)             | 2 (25%)        | 1.00           |

43

44 **Supplemental table S2. The characteristics of GEO datasets**

| GEO accession | Platform | Organism     | Samples                                                 |
|---------------|----------|--------------|---------------------------------------------------------|
| GSE52093      | GPL10558 | Homo sapiens | 5 normal human aortas and 7 aortas from AD patients     |
| GSE98770      | GPL14550 | Homo sapiens | 5 transplant donor aortas and 6 aortas from AD patients |
| GSE213740     | GPL18573 | Homo sapiens | 3 normal human aortas and 6 aortas from AD patients     |

45

46 **Supplemental table S3. Primary and secondary antibodies used in this study**

| Target                           | Host species      | Supplier                  | Catalog No. |
|----------------------------------|-------------------|---------------------------|-------------|
| GLS1                             | Rabbit polyclonal | Proteintech               | 12855-1-AP  |
| RAR $\alpha$                     | Rabbit monoclonal | Abcam                     | ab275745    |
| TAGLN                            | Mouse monoclonal  | Abcam                     | ab14106     |
| ACTA2                            | Rabbit monoclonal | Abcam                     | ab124964    |
| OPN                              | Rabbit polyclonal | Abcam                     | ab8848      |
| ACTA2                            | Mouse monoclonal  | Santa Cruz Biotechnolog   | sc-53015    |
| GAPDH                            | Mouse monoclonal  | Abways Technology         | AB0037      |
| $\beta$ -Actin                   | Mouse monoclonal  | Abways Technology         | AB0035      |
| FLAG tag                         | Mouse monoclonal  | Proteintech               | 66008-3-Ig  |
| PI3K                             | Rabbit monoclonal | Cell Signaling Technology | 4257T       |
| AKT                              | Rabbit monoclonal | Cell Signaling Technology | 4691T       |
| mTOR                             | Rabbit monoclonal | Cell Signaling Technology | 2983T       |
| Phospho-AKT (Ser473)             | Rabbit monoclonal | Cell Signaling Technology | 4060T       |
| Phospho-mTOR (Ser2448)           | Rabbit monoclonal | Cell Signaling Technology | 5536T       |
| Phospho-PI3K                     | Rabbit monoclonal | Affinity Biosciences      | AF-3241     |
| Alexa Fluor® 594 anti-mouse IgG  | Donkey polyclonal | Thermo Fisher Scientific  | A21203      |
| Alexa Fluor® 594 anti-rabbit IgG | Donkey polyclonal | Thermo Fisher Scientific  | A21207      |
| Alexa Fluor® 488 anti-mouse IgG  | Donkey polyclonal | Thermo Fisher Scientific  | A21202      |
| Alexa Fluor® 488 anti-rabbit IgG | Donkey polyclonal | Thermo Fisher Scientific  | A21206      |
| HRP-conjugated anti-mouse IgG    | Goat polyclonal   | Thermo Fisher Scientific  | 31430       |
| HRP-conjugated anti-rabbit IgG   | Goat polyclonal   | Thermo Fisher Scientific  | 31460       |

47

48 **Supplemental table S4. The primer sequences used for qRT-PCR analysis**

| Gene                          | Forward (5' to 3' sequence) | Reverse (5' to 3' sequence) | Species |
|-------------------------------|-----------------------------|-----------------------------|---------|
| <i>GLS1</i>                   | TCTACAGGATTGCGAACGTCT       | CTTTGTCTAGCATGACACCATCT     | Human   |
| <i>RAR<math>\alpha</math></i> | GGGCAAATACACTACGAACAACA     | CTCCACAGTCTTAATGATGCACT     | Human   |
| <i>GAPDH</i>                  | GGAGCGAGATCCCTCCAAAAT       | GGCTGTTGTCATACTTCTCATGG     | Human   |
| <i>ACTA2</i>                  | AAAGCAAGTCCTCCAGCGTT        | TAGTCCCGGGGATAGGCAA         | Human   |
| <i>TAGLN</i>                  | GGAAACCCACCCTCTCAGTC        | TGCACTAGCCAAGTCATCCG        | Human   |
| <i>OPN</i>                    | ATCTCCTAGCCCCACAGACC        | CACACTATCACCTCGGCCAT        | Human   |
| <i>Gls1</i>                   | GATGGCCCTAGGATGTCTGC        | GCTGACTTGCCCACTCTCAT        | Mouse   |
| <i>Rara</i>                   | TTCTTTCCCCCTATGCTGGGT       | GGGAGGGCTGGGTACTATCTC       | Mouse   |
| <i>18S</i>                    | AGTCCCTGCCCTTTGTACACA       | CGATCCGAGGGCCTCACTA         | Mouse   |
| <i>Opn</i>                    | AATCTCCTTGCGCCACAGAA        | GGACATCGACTGTAGGGACG        | Mouse   |
| <i>Acta2</i>                  | CGCCTCCAGTTCCTTTCCAA        | AGAGGGGGCCACCCTATAAT        | Mouse   |
| <i>Tagln</i>                  | AGGGGTGACATCACTGCCTA        | GACTGCACTTCTCGGCTCAT        | Mouse   |

49

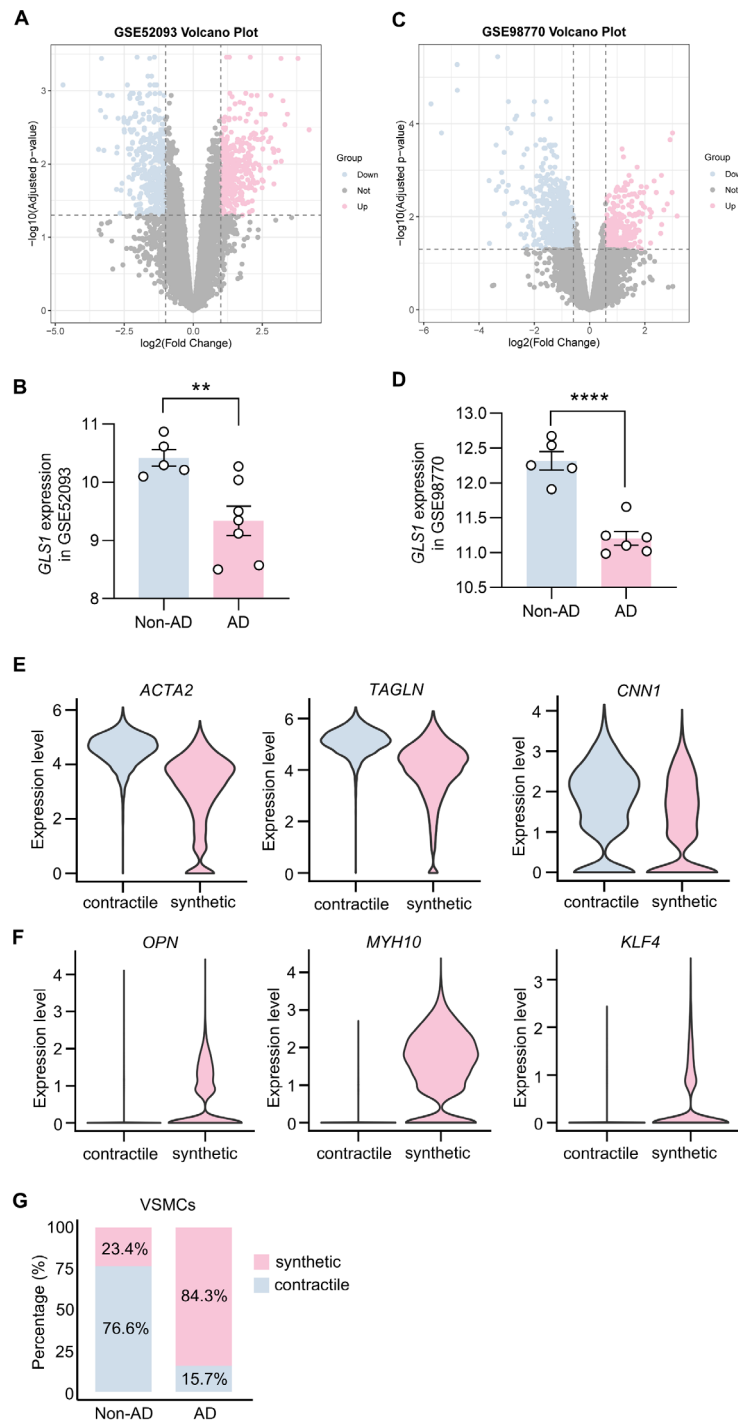

51

**Supplemental Figure S1. GLS1 expression is reduced in aortic dissection.**

52  
53 (A) Volcano plot illustrating differentially expressed genes in human aortic dissection  
54 database (GSE52093), with upregulated (red) and downregulated (blue) genes indicated.

55 (B) The relative *GLS1* expression in the aorta of Non-AD and AD patients according to  
56 GSE52093. (C) Volcano plot illustrating differentially expressed genes in human aortic

57 dissection database (GSE98770), with upregulated (red) and downregulated (blue)  
58 genes indicated. **(D)** The relative *GLSI* expression in the aorta of Non-AD and AD  
59 patients according to GSE98770. **(E)** The expression of contractile markers (ACTA2,  
60 TAGLN, CNN1) in synthetic VSMCs (cluster\_2) and contractile VSMCs (cluster\_5).  
61 **(F)** The expression of synthetic markers (OPN, MYH10, KLF4) in synthetic VSMCs  
62 (cluster\_2) and contractile VSMCs (cluster\_5). **(G)** The proportion of contractile and  
63 synthetic VSMCs in Non-AD and AD groups. Data are presented as mean  $\pm$  SEM.  
64 Statistical analysis was performed using unpaired, two-tailed Student's *t* test (**C** and **D**).  
65 \*\**p* < 0.01, \*\*\*\**p* < 0.0001.  
66

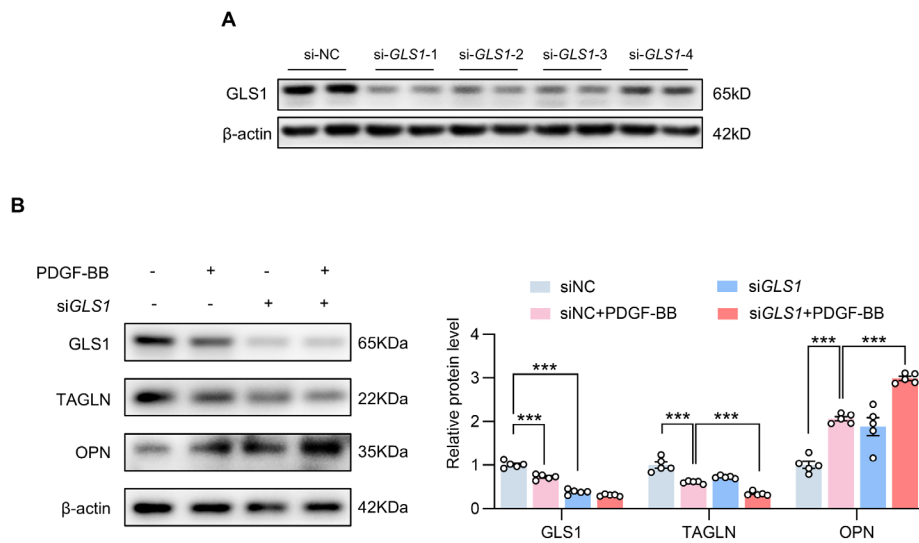

67

68 **Supplemental Figure S2. *GLS1* knockdown aggravates VSMCs phenotypic**  
 69 **switching.**

70 **(A)** The efficiency of si*GLS1* in HASMCs was detected by Western blot. **(B)** HASMCs  
 71 were transfected with siRNA against *GLS1* (si*GLS1*) or negative control (siNC), and  
 72 then treated with PDGF-BB. Western blot and quantitative analysis of *GLS1*, TAGLN  
 73 and OPN expression in HASMCs. Data are presented as mean  $\pm$  SEM. Statistical  
 74 analysis was performed using one-way ANOVA followed by Tukey's multiple-  
 75 comparison test **(B)**. \*\*\* $p < 0.001$ .

76

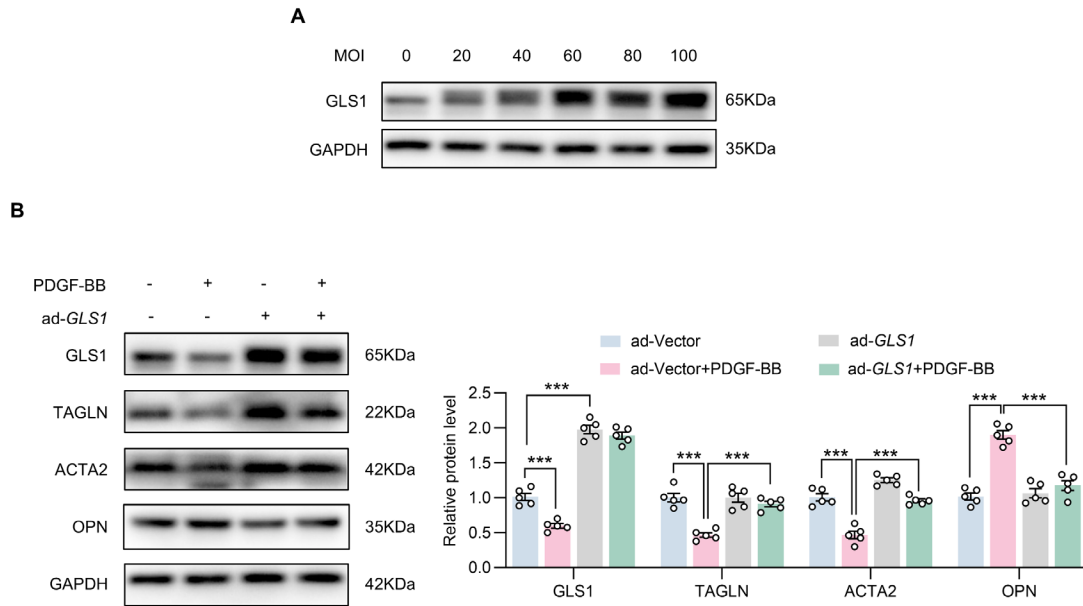

77

78 **Supplemental Figure S3. GLS1 overexpression alleviates VSMCs phenotypic**  
 79 **switching.**

80 **(A)** The efficiency of different concentration of adenovirus mediated GLS1  
 81 overexpression in HASMCs was detected by Western blot. **(B)** HASMCs were infected  
 82 with adenovirus containing empty vector (ad-Vector) or GLS1-encoding plasmids (ad-  
 83 *GLS1*), and then treated with PDGF-BB. Western blot and quantitative analysis of  
 84 GLS1, TAGLN, ACTA2 and OPN expression in HASMCs. Data are presented as mean  
 85  $\pm$  SEM. Statistical analysis was performed using one-way ANOVA followed by Tukey's  
 86 multiple-comparison test **(B)**. \*\*\* $p < 0.001$ .

87

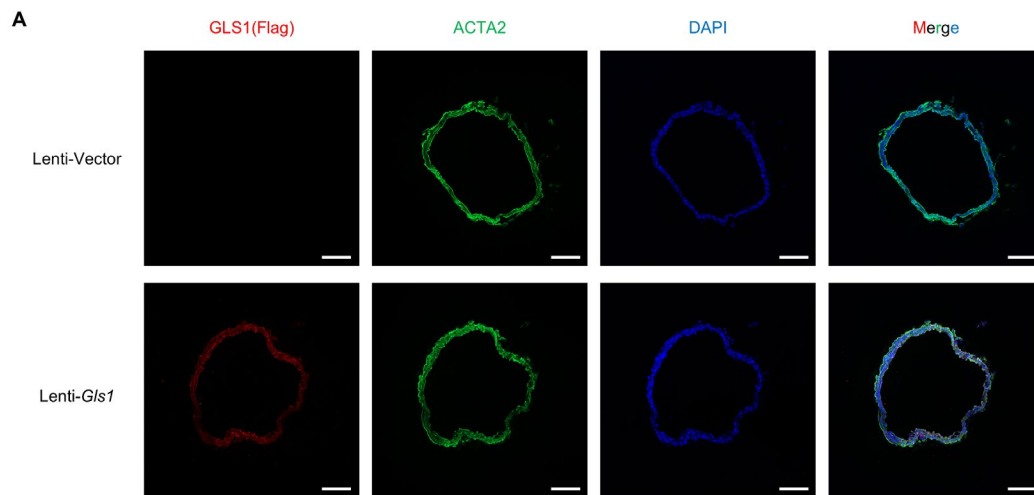

88

89 **Supplemental Figure S4. The efficiency of exogenous GLS1 expression in VSMCs**  
 90 **of aorta.**

91 **(A)** Three-week-old male *Tagln<sup>Cre/+</sup>* mice were intravenously injected with lentivirus  
 92 containing control vector or reverse *Gls1* sequence with two *loxP* sites. The expression  
 93 of exogenous GLS1 was detected by immunofluorescence staining for Flag (red),  
 94 ACTA2 (green) and DAPI (blue) in mice aorta sections. Scale bars, 200  $\mu$ m. n = 3.

95

A

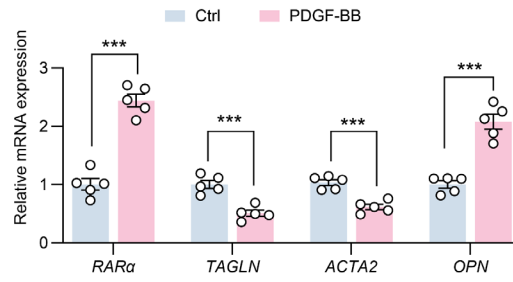

96

97 **Supplemental Figure S5. *RARα* expression is increased in PDGF-BB treated**  
98 **HASMCs.**

99 (A) HASMCs were treated with PDGF-BB. The mRNA expression of *RARα*, *TAGLN*,  
100 *ACTA2* and *OPN* in HASMCs was detected by qRT-PCR. Data are presented as mean  
101  $\pm$  SEM. Statistical analysis was performed using unpaired, two-tailed Student's *t* test  
102 (A). \*\*\* $p < 0.001$ .

103

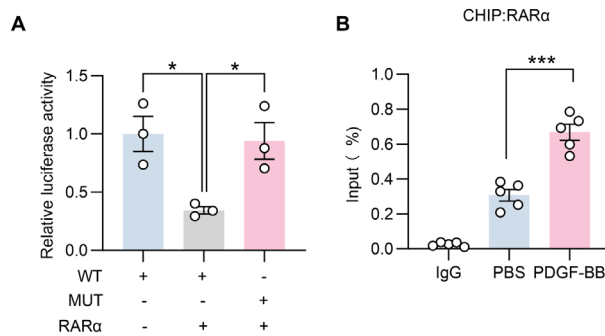

104

105 **Supplemental Figure S6. Verification of the binding of RAR to *GLS1* promoter.**

106 **(A)** Relative luciferase activity in HASMCs co-infected with adenoviruses carrying  
 107 either the wild-type *GLS1* promoter or its transcription factor binding site 2 (TFBS2)  
 108 mutant luciferase reporter constructs, along with adenovirus expressing RARα. **(B)**  
 109 HASMCs were treated with PDGF-BB. Chromatin immunoprecipitation (ChIP) assays  
 110 were performed with IgG or anti- RARα antibody, followed by qRT-PCR with primers  
 111 targeting *GLS1* promoter regions. Data are presented as mean ± SEM. Statistical  
 112 analysis was performed using one-way ANOVA followed by Tukey's multiple-  
 113 comparison test **(A)** and unpaired, 2-tailed Student's *t* test **(B)**. \**p* < 0.05, \*\*\**p* < 0.001.

114

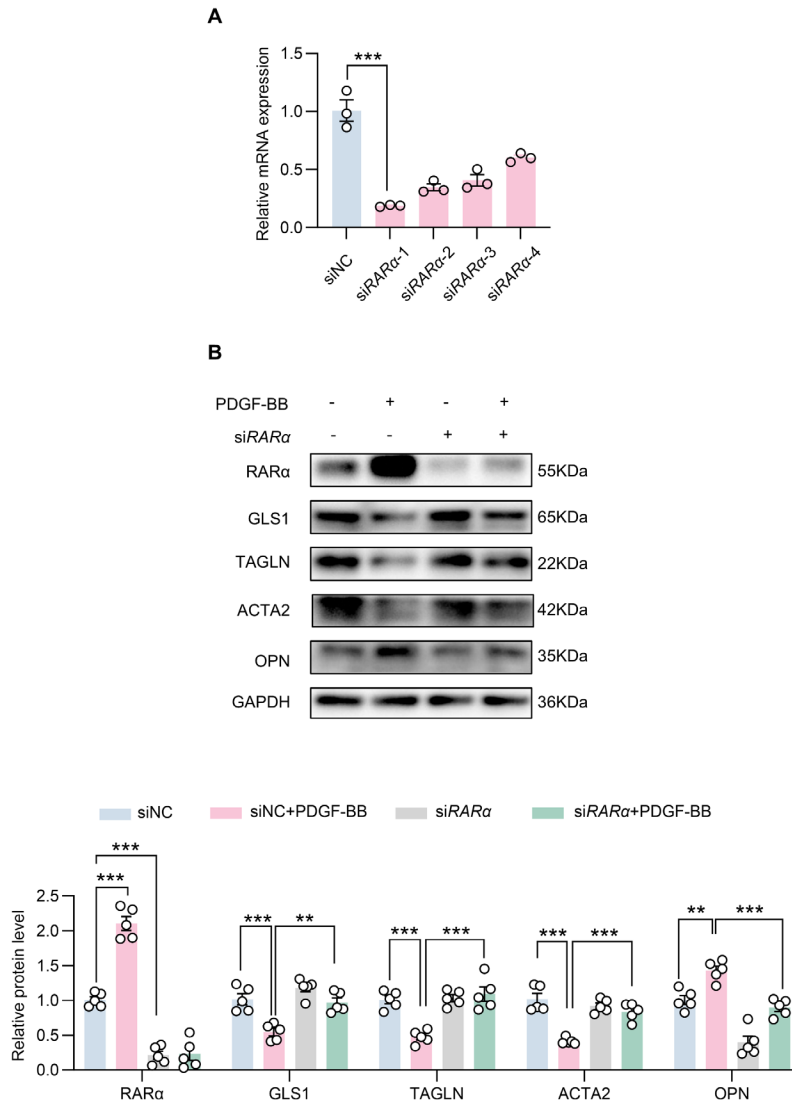

115

116 **Supplemental Figure S7. *RARα* knockdown alleviates VSMCs phenotypic**  
 117 **switching.**

118 (A) The efficiency of si*RARα* in HASMCs was detected by qRT-PCR. (B) HASMCs  
 119 were transfected with siRNA against *RARα* (si*RARα*) or negative control (siNC), and  
 120 then treated with PDGF-BB. Western blot analysis of RARα, GLS1, TAGLN, ACTA2  
 121 and OPN expression in HASMCs. Data are presented as mean ± SEM. Statistical  
 122 analysis was performed using one-way ANOVA followed by Tukey's multiple-  
 123 comparison test (C). \*\*p < 0.01, \*\*\*p < 0.001.
